# Supplementary material for: Pan-cancer analysis reveals an immunological role and prognostic potential of PXN in human cancer
Source: publisher site journal article supplement (doi:10.18632/aging.203154), 2021-06-16
Supplement: Supplementary file [file aging-v13i12-203154-supplementary-material-SD1.pdf]

SUPPLEMENTARY FIGURES

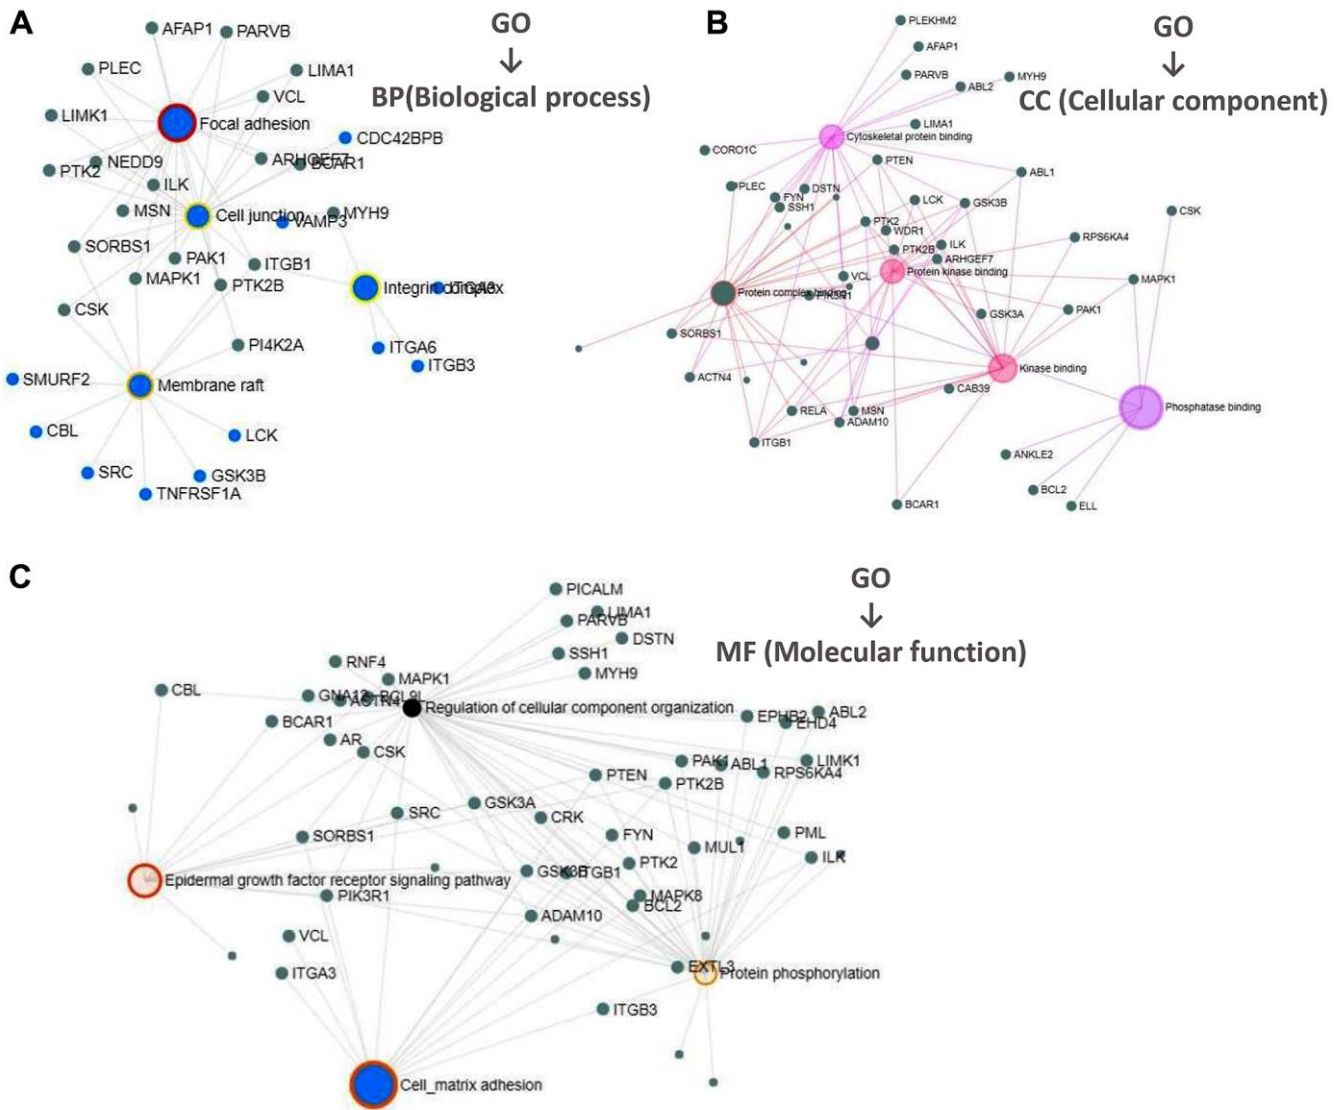

**Supplementary Figure 1. Gene Ontology (GO) biological process/cellular component analysis of *PXN*-related genes in tumors.** The “cnetplots” models from GO enrichment analysis for (A) the biological process, (B) the cellular component, and (C) the molecular function data are shown.

**A**

☒  $p > 0.05$   
 ■  $p \leq 0.05$

Partial  
 1  
 0  
 -1

**Endothelial cells**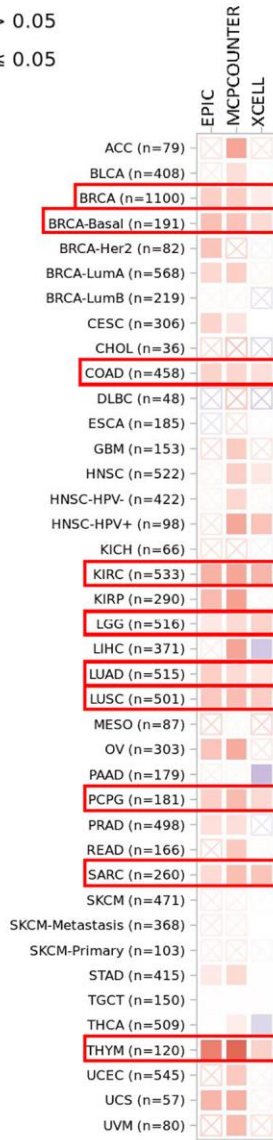**B**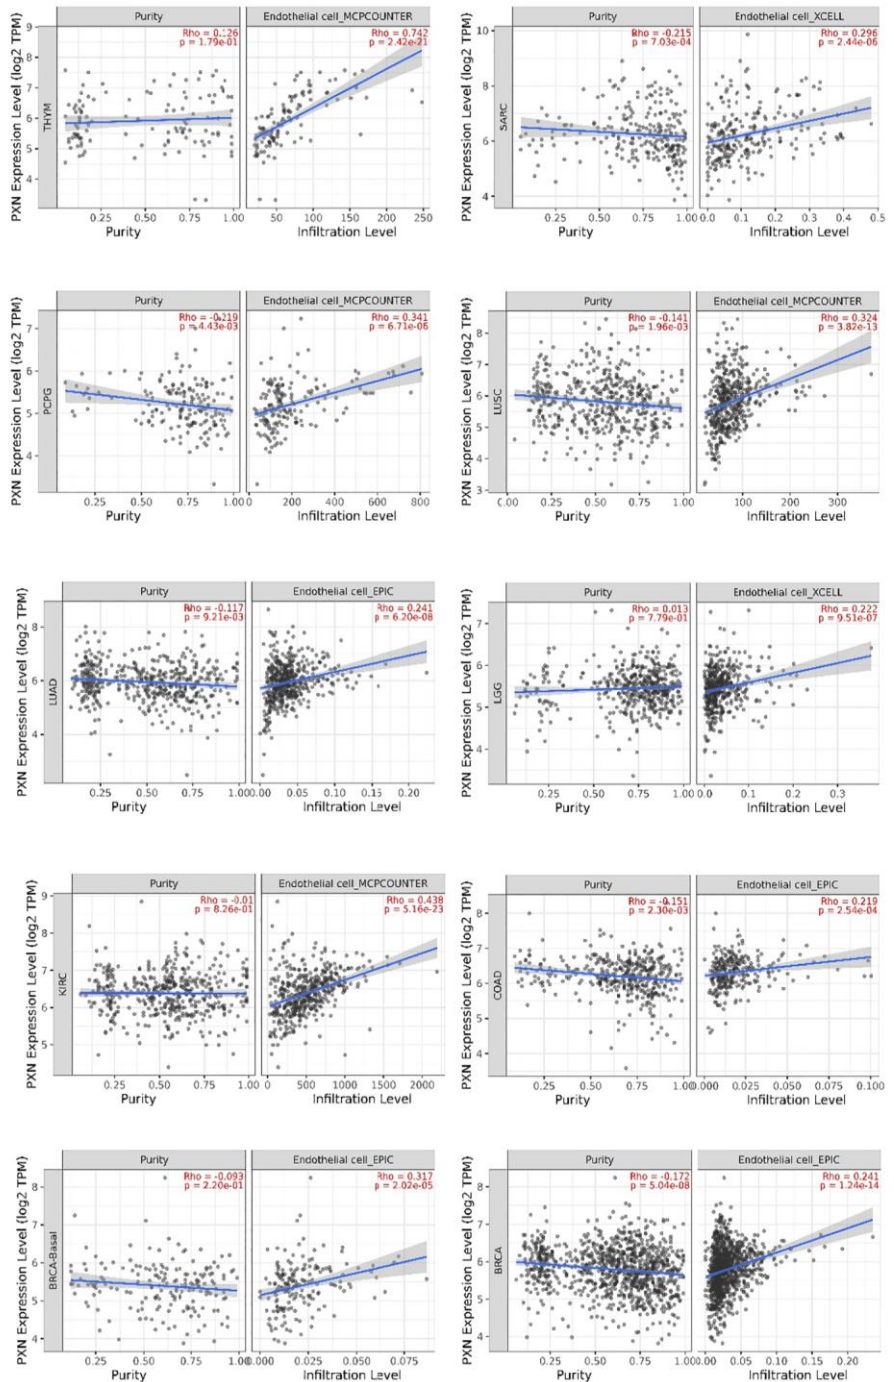

**Supplementary Figure 2. Correlation analysis between *PXN* gene expression and immune infiltration of endothelial cells.** Different algorithms explored potential correlations of (A) the expression level of the *PXN* gene and (B) the infiltration level of endothelial cells across all types of cancer in The Cancer Genome Atlas.
